# Supplementary material for: Etching high-Fe-content PtPdFe nanoparticles as efficient catalysts towards glycerol electrooxidation
Source: Royal Society of Chemistry journal article supplement (doi:10.1039/c9nj06259a), 2020-01-01
Supplement: c9nj06259a1.pdf [file c9nj06259a1.pdf]

**Supporting information**

**Etching high-Fe-content PtPdFe nanoparticles as efficient  
catalysts towards glycerol electrooxidation**

Jiao Zhao<sup>1, a</sup>, Wangli Jing<sup>1, a</sup>, Ting Tan<sup>a</sup>, Xianyi Liu<sup>a</sup>, Yumao Kang<sup>b</sup>, Wei Wang<sup>a, \*</sup>

*<sup>a</sup>School of Chemical and Biological Engineering, Lanzhou Jiaotong  
University, Lanzhou 730070, China*

*<sup>b</sup>Key Laboratory of Eco-Environment-Related Polymer Materials,  
Ministry of Education of China, Key Laboratory of Gansu Polymer  
Materials, College of Chemistry and Chemical Engineering,  
Northwest Normal University, Lanzhou 730070, China*

---

✉ Corresponding author, e-mail: [wangwchem@163.com](mailto:wangwchem@163.com), [wangw@mail.lzjtu.cn](mailto:wangw@mail.lzjtu.cn), Tel.  
/Fax: +86 931 4956220.

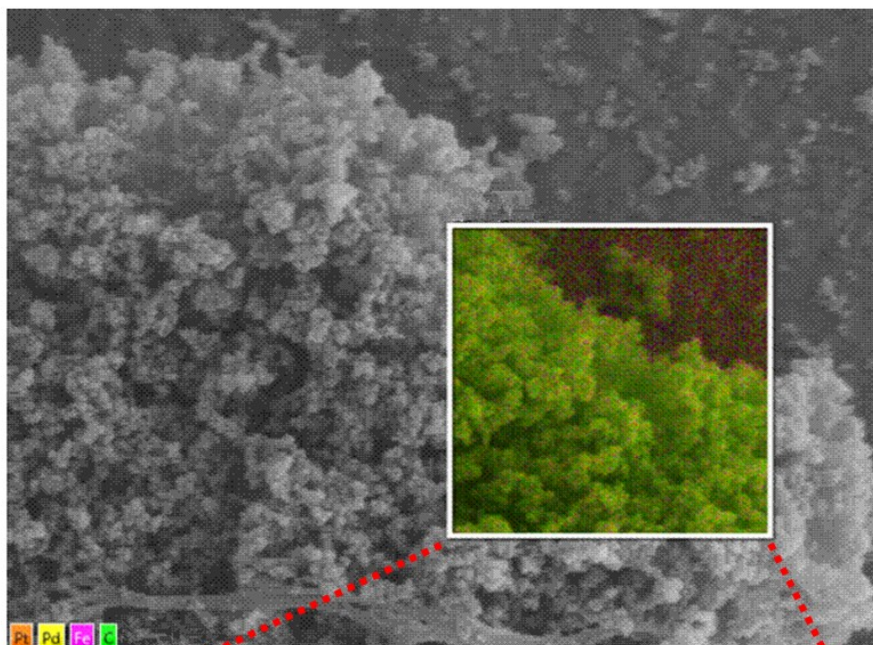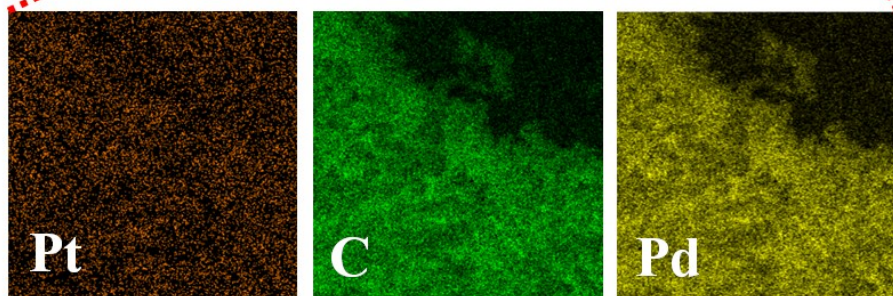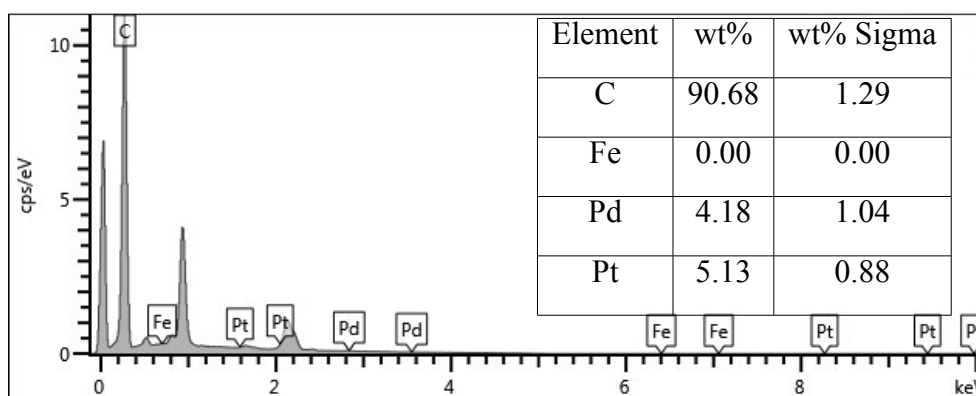

**Fig. S1** SEM and corresponding EDS of PtPd-6/C.

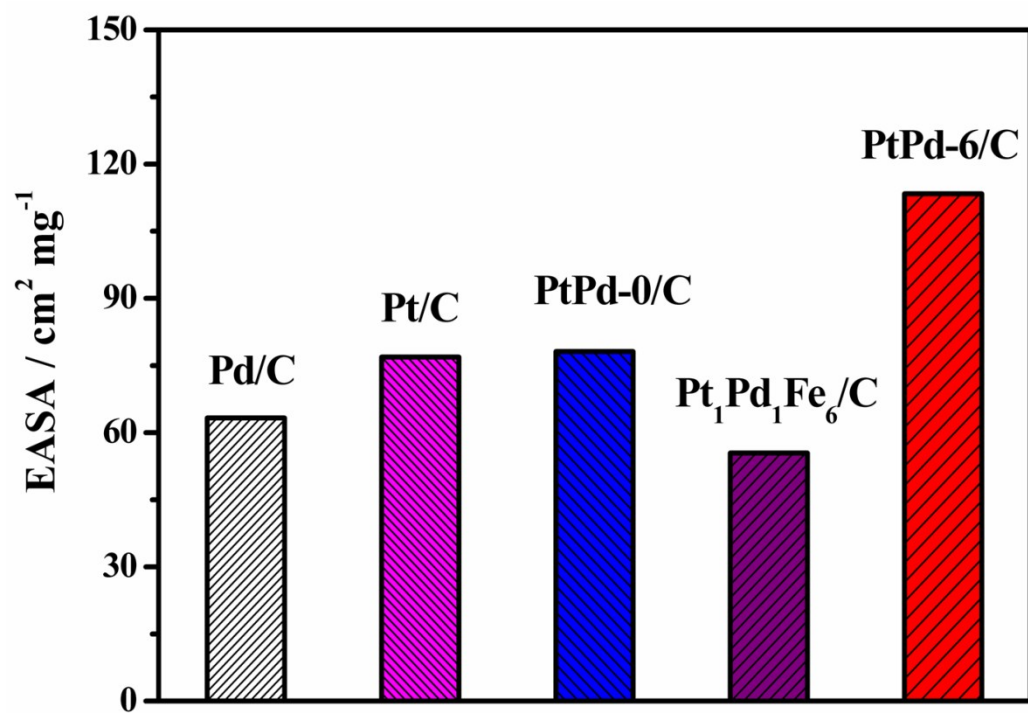

**Fig. S2** The EASA comparison on Pd/C, Pt/C, PtPd-0/C, Pt<sub>1</sub>Pd<sub>1</sub>Fe<sub>6</sub>/C and PtPd-6/C.

**Table S1.** Comparison of electrocatalytic performance on noble metal-based electrocatalysts toward GOR in alkaline medium.

| Electrocatalysts                       | Particle size (nm) | Electrolyte                 | Oxidation peak current (A mg <sup>-1</sup> noble metal) | Noble metal loading (%) | References |
|----------------------------------------|--------------------|-----------------------------|---------------------------------------------------------|-------------------------|------------|
| PtPd-6/C                               | 2.8                | 0.1 M KOH + 0.5 M Glycerol  | 0.86 (vs. Ag/AgCl)                                      | 9.41                    | This work  |
| Pd <sub>55</sub> Pt <sub>30</sub> NNWs | 5.0                | 1.0 M KOH + 0.1 M Glycerol  | 0.66 (vs. Ag/AgCl)                                      | 25.57                   | [1]        |
| Pd <sub>0.5</sub> Au <sub>0.5</sub> /C | 5.0                | 1.0 M NaOH + 0.1 M Glycerol | 0.09 (vs. RHE)                                          | 37.00                   | [2]        |
| Pd-NiO <sub>x</sub> -P/C               | 4.4                | 0.1 M KOH + 0.5 M Glycerol  | 0.36 (vs. Ag/AgCl)                                      | 14.00                   | [3]        |
| Pd/Cu/NPSS                             | N/A                | 1.0 M KOH + 5 wt.% Glycerol | 0.82 (vs. Ag/AgCl)                                      | 11.78                   | [4]        |
| Pd-CN <sub>x</sub> /G                  | 4.4                | 0.5 M NaOH + 0.5 M Glycerol | 1.10 (vs. Hg/HgO)                                       | 28.00                   | [5]        |
| FeCo@Fe@Pd/C                           | 3~7                | 0.5 M KOH + 0.5 M Glycerol  | 0.26 (vs. Ag/AgCl)                                      | 22.00                   | [6]        |
| Pt <sub>5</sub> Ru <sub>5</sub> /GNS   | 1.8                | Biomass-derived glycerol    | 0.27 (vs. Ag/AgCl)                                      | 60.00                   | [7]        |
| Pd <sub>50</sub> Ag <sub>50</sub> /C   | 3.73~3.97          | 0.1 M NaOH + 0.1 M Glycerol | 0.26 (vs. RHE)                                          | 25.60                   | [8]        |
| Pd/CPAA                                | N/A                | 1.0 M KOH + 1.0 M Glycerol  | 0.24 (vs. Hg/HgO)                                       | 50.00                   | [9]        |
| Pd <sub>3</sub> Sn/phen-C              | 5.3                | 0.1 M KOH + 0.5 M Glycerol  | 0.18 (vs. Ag/AgCl)                                      | 14.80                   | [10]       |
| Pd <sub>3</sub> Cu/NMC                 | N/A                | 0.1 M KOH + 0.5 M Glycerol  | 0.33 (vs. Ag/AgCl)                                      | 13.90                   | [11]       |

## References

- [1] W. Hong, C. Shang, J. Wang, E. Wang, *Energy Environ. Sci.*, 2015, **10**, 2910-2915.
- [2] M. Simões, S. Baranton, C. Coutanceau, *Appl. Catal. B: Environ.*, 2010, **93**, 354-362.

- [3] X. Zhao, J. Zhang, L. Wang, H.X. Li, Z. Liu, W. Chen, *ACS Appl. Mater. Inter.*, 2015, **7**, 26333-26339.
- [4] B. Rezaei, E. Havakeshian, A.A. Ensafi, *Electrochim. Acta*, 2014, **136**, 89-96.
- [5] A. Zalineeva, A. Serov, M. Padilla, U. Martinez, K. Artyushkova, S. Baranton, C. Coutanceau, P.B. Atanassov, *J. Am. Chem. Soc.*, 2014, **136** 3937-3945.
- [6] O.O. Fashedemi, K.I. Ozoemena, *Electrochim. Acta*, 2014, **128**, 279-286.
- [7] H.J. Kim, S.M. Choi, M.H. Seo, S. Green, G.W. Huber, W.B. Kim, *Electrochem. Commun.*, 2011, **13**, 890-893.
- [8] Y. Holade, C. Morais, S.A. Clacens, K. Servat, T.W. Napporn, K.B. Kokoh, *Electrocatalysis*, 2013, **4**, 167-178.
- [9] Z. Wang, F. Hu, P.K. Shen, *Electrochem. Commun.*, 2006, **8**, 1764-1768.
- [10] W. Wang, Y. Kang, Y. Yang, Y. Liu, D. Chai, Z. Lei, *Int. J. Hydrogen Energy*, 2016, **41**, 1272-1280.
- [11] H. Wang, L. Thia, N. Li, X. Ge, Z. Liu, X. Wang, *ACS Catal.*, 2015, **5**, 3174-3180.
